# Supplementary material for: AWD regulates timed activation of BMP signaling in intestinal stem cells to maintain tissue homeostasis
Source: PubMed Central journal article supplement (PMC6611797; doi:10.1038/s41467-019-10926-2), 2019-07-05
Supplement: 41467_2019_10926_MOESM4_ESM.pdf [file 41467_2019_10926_MOESM4_ESM.pdf]

## Description of Additional Supplementary Files

**Supplementary Movie 1: Tkv-GFP presents as puncta in ISCs upon *Ecc15* infection, related to Figure 1.** Flies with ISCs overexpressing Tkv-GFP (*esgG4*, *Su(H)GBEG80*, *tubG80<sup>ts</sup>*, green) for 6 days were orally fed with *Ecc15* for 20 hours before dissection and imaged *ex vivo* at 30s intervals for 45mins. Timelapse indicated as minutes:seconds.

**Supplementary Movie 2: Dynamics of Tkv-GFP puncta and lysosomes in wildtype ISCs under homeostatic conditions, related to Figure 3 and Supplementary Figure 4.** ISCs overexpressing Tkv-GFP (*esgG4*, *Su(H)GBEG80*, *tubG80<sup>ts</sup>*, green) for 7 days were imaged *ex vivo* at 30s intervals for 30mins. Lysosomes were indicated by LysoTracker staining (red). Timelapse indicated as minutes: seconds.

**Supplementary Movie 3: Dynamics of Tkv-GFP puncta and lysosomes in *awd<sup>OE</sup>* ISCs under homeostatic conditions, related to Figure 3 and Supplementary Figure 4.** Flies with ISCs co-expressing *awd<sup>OE</sup>* and Tkv-GFP (*esgG4*, *Su(H)GBEG80*, *tubG80<sup>ts</sup>*, green) for 7 days were imaged *ex vivo* at 30s intervals for 30mins. Lysosomes were indicated by LysoTracker staining (red). Timelapse indicated as minutes: seconds.

**Supplementary Movie 4: Dynamics of Tkv-GFP puncta and lysosomes in wildtype ISCs upon *Ecc15* infection, related to Figure 3 and Supplementary Figure 4.** Flies with ISCs overexpressing Tkv-GFP (*esgG4*, *Su(H)GBEG80*, *tubG80<sup>ts</sup>*, green) for 6 days were orally fed with *Ecc15* for 20 hours before dissection and imaged *ex vivo* at 30s intervals for 30mins. Lysosomes were indicated by LysoTracker staining (red). Timelapse indicated as minutes: seconds.

**Supplementary Movie 5: Dynamics of Tkv-GFP puncta and lysosomes in *awd*<sup>OE</sup> upon *Ecc15* infection, related to Supplementary Figure 4.** Flies with ISCs co-expressing *awd*<sup>OE</sup> and Tkv-GFP (*esgG4*, *Su(H)GBEG80*, *tubG80<sup>ts</sup>*, green) for 6 days were orally fed with *Ecc15* for 20 hours before dissection and imaged *ex vivo* at 30s intervals for 30mins. Lysosomes were indicated by LysoTracker staining (red). Timelapse indicated as minutes: seconds.

**Supplementary Movie 6: Dynamics of Tkv-GFP puncta and lysosomes in *awd*<sup>RNAi</sup> upon *Ecc15* infection, related to Figure 3 and Supplementary Figure 4.** Flies with ISCs co-expressing *awd*<sup>RNAi</sup> and Tkv-GFP (*esgG4*, *Su(H)GBEG80*, *tubG80<sup>ts</sup>*, green) for 6 days were orally fed with *Ecc15* for 20 hours before dissection and imaged *ex vivo* at 30s intervals for 30mins. Lysosomes were indicated by LysoTracker staining (red). Timelapse indicated as minutes: seconds.
